# Supplementary material for: Development of Cationic Cellulose-Modified Bentonite–Alginate Nanocomposite Gels for Sustained Release of Alachlor
Source: PubMed Central journal article supplement — ACS Omega. 2022 May 31;7(23):20032–43. doi: 10.1021/acsomega.2c01805 (PMC9202269; doi:10.1021/acsomega.2c01805), 2022-05-31
Supplement: ao2c01805_si_001.pdf [file ao2c01805_si_001.pdf]

# Development of cationic cellulose modified bentonite-alginate nanocomposite gel for sustained release of alachlor

Xiaocheng Wang, Xiaojun Hou, Peiyu Zou, Min Zhang, Lin Ma\*

School of Chemistry and Chemical Engineering, Guangxi University, Nanning

530004, P. R. China

| Figure/Table number | Figure/Table caption                                                                                                                             |
|---------------------|--------------------------------------------------------------------------------------------------------------------------------------------------|
| Figure S1           | Release kinetics of alachlor from alginate nanocomposites with organobentonite modified with cationic cellulose of different loading levels.     |
| Figure S2           | SEM images of alachlor loaded bentonite-alginate nanocomposite.                                                                                  |
| Table S1            | The dehydration mass loss rate and the initial mass loss temperature of bentonite, cationic cellulose and cationic cellulose modified bentonite. |

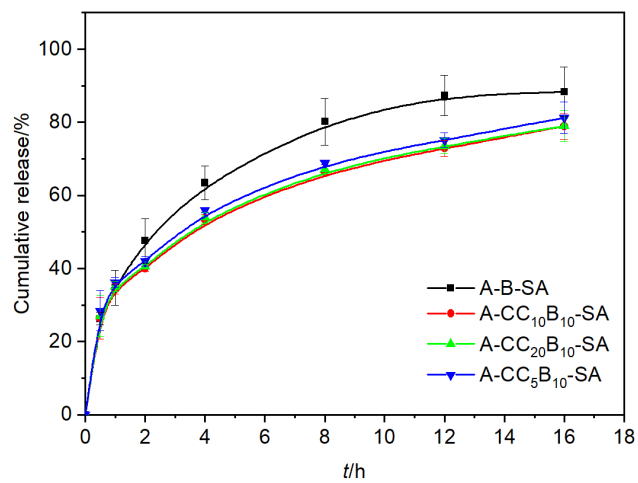

**Figure S1.** Release kinetics of alachlor from alginate nanocomposites with organobentonite modified with cationic cellulose of different loading levels.

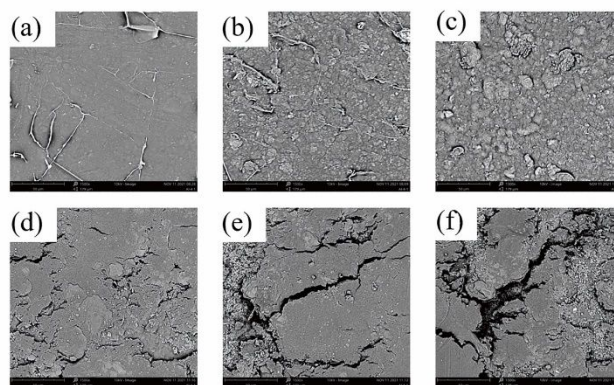

**Figure S2.** SEM images of alachlor loaded bentonite-alginate nanocomposite. (a)A-SA, (b)A-B<sub>2.5</sub>-SA, (c)A-B<sub>5</sub>-SA, (d) A-B<sub>10</sub>-SA, (e) A-B<sub>20</sub>-SA, (f) A-B<sub>30</sub>-SA.

**Table S1.** The dehydration mass loss rate and the initial mass loss temperature of bentonite, cationic cellulose and cationic cellulose modified bentonite.

| Sample             | Dehydration rate/% | Dehydration temperature/°C |
|--------------------|--------------------|----------------------------|
| Bentonite          | 9.9                | 105                        |
| CC                 | 5.4                | 98.2                       |
| CC <sub>10</sub> B | 7.3                | 79.4                       |
